# Supplementary material for: Sponges in a Changing Climate: Survival of Agelas oroides in a Warming Mediterranean Sea
Source: Frontiers journal article supplement (doi:10.3389/fmars.2020.603593), 2020-12-08
Supplement: Table_1.DOCX [file Table_1.DOCX]

Table. S1. Sponges in the transplantation experiment. Treatment 2 indicates whether the sponge was attached inside or outside a box. Initially seven sponges were attached outside the crates; two died shortly after transplantation and one was lost in a storm.

| Sponge  Number | Treatment | Treatment 2 | Days until death | Temperature at date of death | Days until sponges stopped pumping | Temperature when pumping stopped |
| --- | --- | --- | --- | --- | --- | --- |
| 1S | Shallow | Shallow in crate | 101 | 30 | 83 | 28 |
| 2S | Shallow | Shallow out of crate | 70 | 28 | 42 | 23 |
| 3S | Shallow | Shallow in crate | 110 | 30 | 83 | 28 |
| 5S | Shallow | Shallow in crate | 83 | 28 | 83 | 28 |
| 8S | Shallow | Shallow out of crate | 101 | 30 | 83 | 28 |
| 9S | Shallow | Shallow in crate | 101 | 30 | 60 | 28 |
| 13S | Shallow | Shallow out of crate | 101 | 30 | 83 | 28 |
| 14S | Shallow | Shallow in crate | 101 | 30 | 83 | 28 |
| 15S | Shallow | Shallow in crate | 83 | 28 | 42 | 23 |
| 16S | Shallow | Shallow in crate | 101 | 30 | 70 | 28 |
| 17S | Shallow | Shallow in crate | 101 | 30 | 70 | 28 |
| 18S | Shallow | Shallow in crate | 101 | 30 | 70 | 28 |
| 19S | Shallow | Shallow in crate | 101 | 30 | 70 | 28 |
| 20S | Shallow | Shallow in crate | 101 | 30 | 70 | 28 |
| 4M | Deep | Deep | Na |  | Na |  |
| 6M | Deep | Deep | Na |  | Na |  |
| 7M | Deep | Deep | Na |  | Na |  |
| 10M | Deep | Deep | Na |  | Na |  |
| 11M | Deep | Deep | Na |  | Na |  |
| 12M | Deep | Deep | Na |  | Na |  |
